# Supplementary material
Source: Springer Nature journal article supplement (https://www.springermedizin.de/resource/supplementary/13032_2008_14_MOESM3_ESM.pdf/9651438)

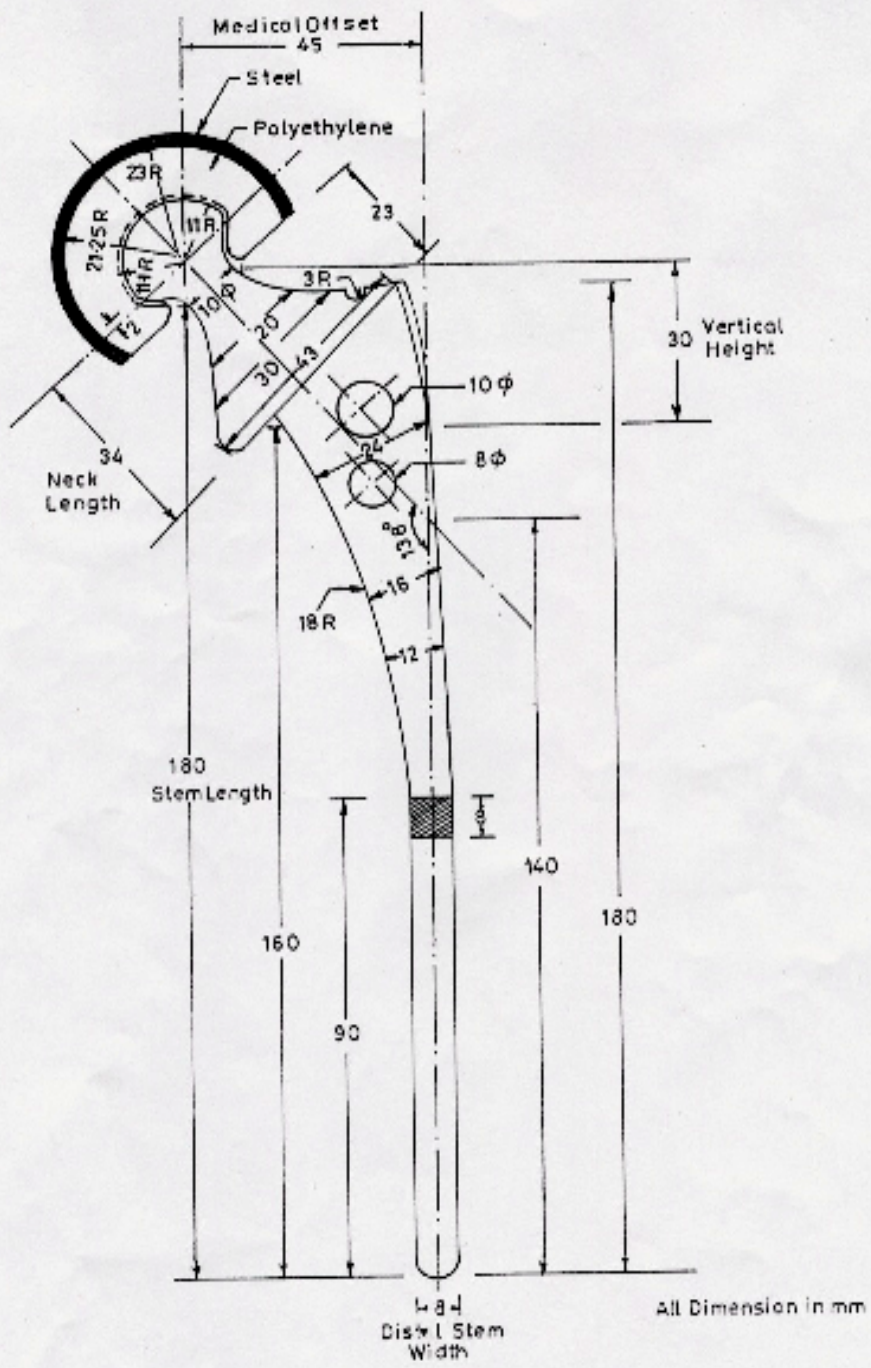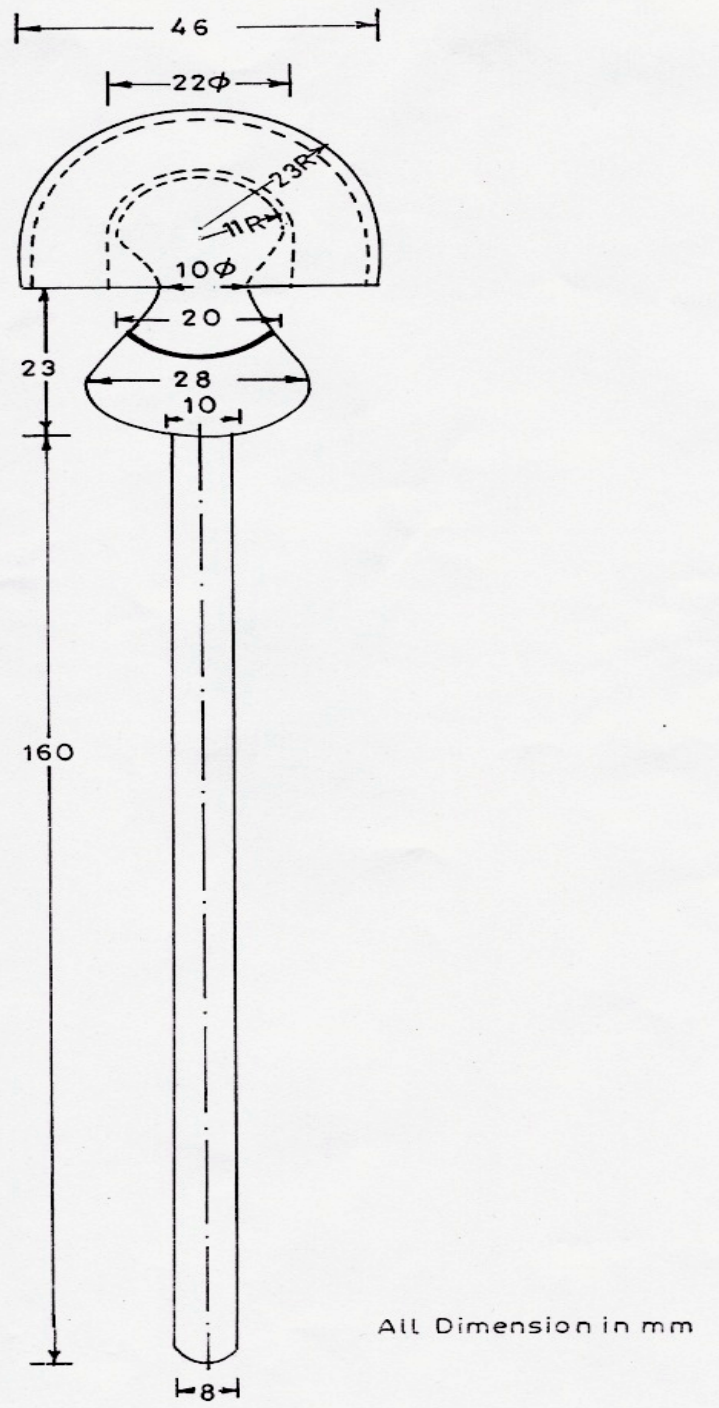

Supplement: MOESM3 [file 9651438]
